# Supplementary material
Source: PubMed Central journal article supplement (PMC7350996)
Supplement: ASN.2019050521SupplementaryData.pdf [file ASN.2019050521SupplementaryData.pdf]

**Table of Contents**

Supplemental Table 1. Published Epidemiological Studies of Mesoamerican Nephropathy.....2

Supplemental Figure 1. Map of Nicaragua showing Department of Rivas; Location of Participant Recruitment.....3

Supplemental Table 1. Published Epidemiological Studies of Mesoamerican Nephropathy

| Study                         | Location                          | Study Population | Male (%) | Age Range<br>Mean Age    | Creatinine Assay Measurement              | eGFR Equation   | eGFR <60/ml/mg/1.73m <sup>2</sup><br>(%) |        |
|-------------------------------|-----------------------------------|------------------|----------|--------------------------|-------------------------------------------|-----------------|------------------------------------------|--------|
|                               |                                   |                  |          |                          |                                           |                 | Male                                     | Female |
| Torres <sup>17</sup>          | Leon, Nicaragua                   | 1096             | 44       | 20-60<br>34              | IDMS Traceable Serum Creatinine           | MDRD            | 14.2                                     | 3.2    |
| Peraza <sup>33</sup>          | El Salvador                       | 664              | 38       | 20-60<br>37              | IDMS Traceable Serum Creatinine           | MDRD            | 8.6                                      | 4.7    |
| Laux <sup>15</sup>            | Matagalpa, Nicaragua              | 267              | 45       | 20-60<br>34              | Capillary Creatinine                      | MDRD            | 0                                        | 1.4    |
| O'Donnell <sup>16</sup>       | Leon, Nicaragua                   | 771              | 39       | >18<br>39                | IDMS Traceable Serum Creatinine           | MDRD            | 20.1                                     | 8.0    |
| Orantes <sup>32</sup>         | El Salvador                       | 2388             | 44       | >18<br>(15% ><br>age 60) | Serum Creatinine<br>(Method not reported) | MDRD            | 17.0                                     | 6.8    |
| Sanoff <sup>14</sup>          | Leon and Chinandega,<br>Nicaragua | 997              | 85       | >18<br>39                | Serum Creatinine<br>(Method not reported) | MDRD            | 14.0                                     | 3.4    |
| Raines <sup>13</sup>          | Chinandega, Nicaragua             | 401              | 39       | >20<br>33                | IDMS Traceable Serum Creatinine,          | CKD-EPI         | 41.9                                     | 9.8    |
| Lebov <sup>12</sup>           | Leon, Nicaragua                   | 2275             | 42       | 18-70<br>38              | IDMS Traceable Serum Creatinine           | MDRD            | 13.8                                     | 5.8    |
| mGallo-Ruiz <sup>27</sup>     | Leon, Nicaragua                   | 224              | 86       | 18-60<br>34              | IDMS Traceable Serum Creatinine           | CKD-EPI         | 12.1                                     | 0      |
| Kupferman <sup>34</sup>       | Chinandega, Nicaragua             | 326              | 100      | 18-60<br>(median;<br>34) | Serum Creatinine<br>(Method not reported) | CKD-EPI         | 34.5                                     | 0      |
| Gonzalez-Quiroz <sup>29</sup> | Leon and Chinandega,<br>Nicaragua | 350              | 75       | 18-30<br>24              | IDMS Traceable Serum Creatinine           | CKD-EPI         | 9.5                                      | 3.4    |
| Fischer <sup>28</sup>         | Chinandega, Nicaragua             | 586              | 90       | 18-59<br>(median;<br>28) | IDMS Traceable Serum Creatinine           | MDRD            | 1.9*                                     |        |
|                               |                                   |                  |          |                          |                                           | CKD-EPI         | 1.5*                                     |        |
|                               |                                   |                  |          |                          |                                           | Cockcroft-Gault | 1.5*                                     |        |
| Laws <sup>6</sup>             | Chinandega, Nicaragua             | 284              | 88       | 18-63<br>34              | IDMS Traceable Serum Creatinine           | CKD-EPI         | 0 <sup>^</sup>                           | 4.2    |
| Wesseling <sup>7</sup>        | Leon and Chinandega,<br>Nicaragua | 194              | 100      | 17-39                    | IDMS Traceable Serum Creatinine           | CKD-EPI         | 10.3+                                    | -      |

\* No male/female breakdown – combined (%)  
<sup>^</sup> Male group used as reference  
<sup>+</sup> eGFR <80/ml/mg/1.73m<sup>2</sup>

Supplemental Figure 1. Map of Nicaragua showing Department of Rivas; Location of Participant Recruitment

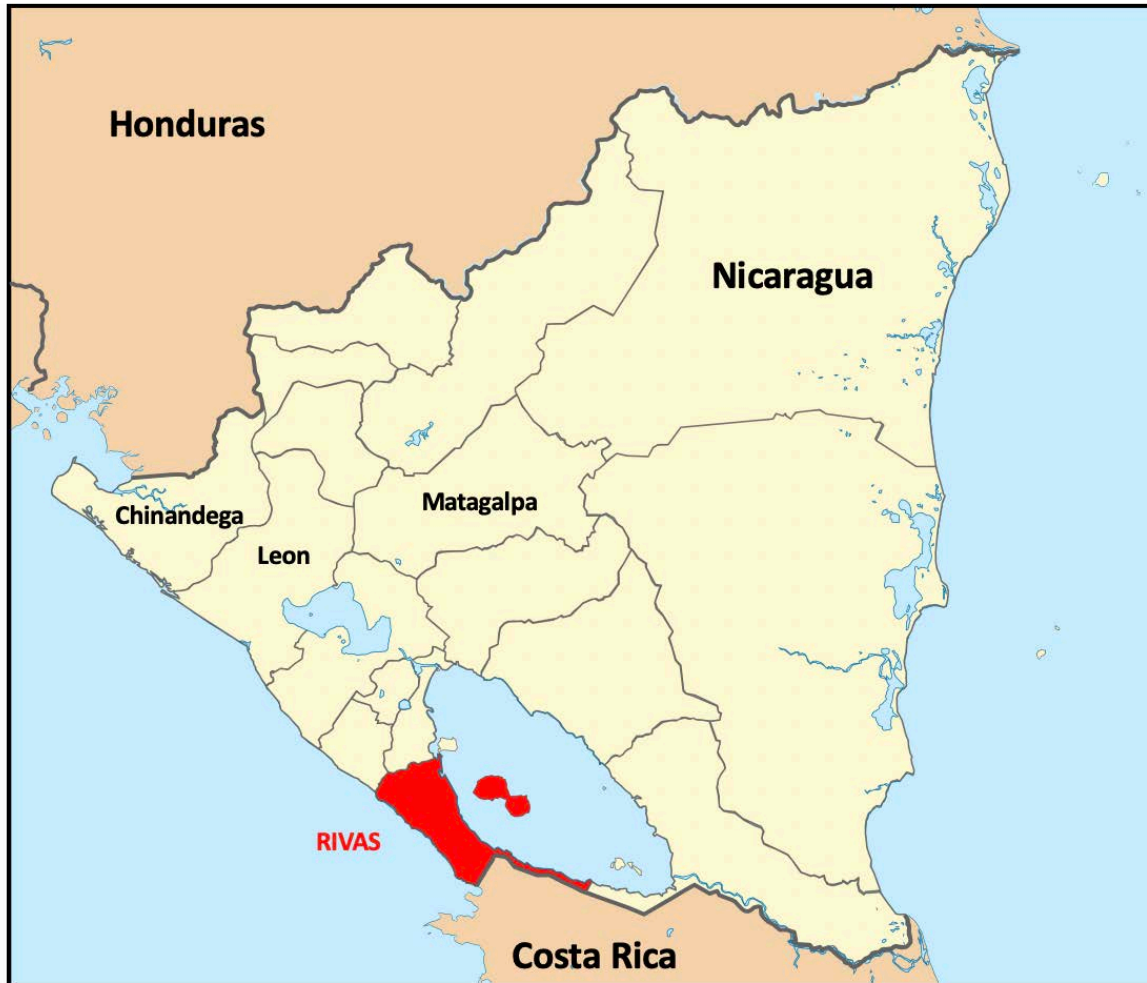

Adapted from a publicly available map:

[https://upload.wikimedia.org/wikipedia/commons/4/4b/Rivas\\_Department%2C\\_Nicaragua.svg](https://upload.wikimedia.org/wikipedia/commons/4/4b/Rivas_Department%2C_Nicaragua.svg)
